# Supplementary material for: A comparative vibrational CD study of homo- and heteroleptic complexes of the type [Cu(trans-1,2-diaminocyclohexane)2L](ClO4)2
Source: Royal Society of Chemistry journal article supplement (doi:10.1039/c3dt50459j), 2013-05-16
Supplement: c3dt50459j.pdf [file c3dt50459j.pdf]

## Supporting Information for

# **A comparative vibrational CD study of homo- and heteroleptic complexes of the type [Cu(*trans*-1,2-diaminocyclohexane)<sub>2</sub>L](ClO<sub>4</sub>)<sub>2</sub>.**

*Christian Merten, Yunjie Xu*

Department of Chemistry, University of Alberta, Edmonton, Alberta, T6G2G2, Canada

### **Content:**

1. Structures and spectra of [Cu(chxn)<sub>3</sub>]<sup>2+</sup>
2. Direct comparison of the experimental VCD spectra of all three complexes investigated
3. Structures and energies of [Cu(chxn)<sub>2</sub>(en)]<sup>2+</sup>
4. Single-isomer spectra
5. Cartesian coordinates for [Cu(chxn)<sub>3</sub>]<sup>2+</sup> and [Cu(chxn)<sub>2</sub>(en)]<sup>2+</sup>

## 1. Structures and spectra of $[\text{Cu}(\text{chxn})_3]^{2+}$

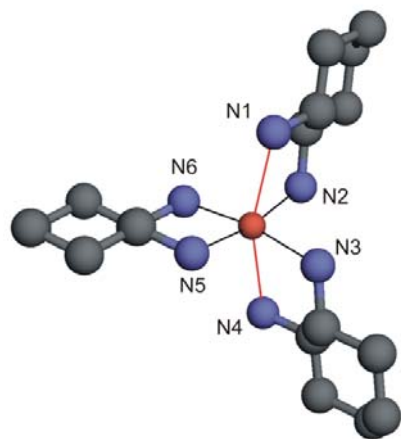

**Table S1.** Selected bond length (Å) and bond angles (°) of the calculated structure of  $\text{Cu}(\text{chxn})_3^{2+}$

|         |       |              |         |
|---------|-------|--------------|---------|
| Cu-N(1) | 2.556 | N(1)-Cu-N(2) | 75.438  |
| Cu-N(2) | 2.102 | N(3)-Cu-N(4) | 75.416  |
| Cu-N(3) | 2.101 | N(5)-Cu-N(6) | 81.735  |
| Cu-N(4) | 2.556 | N(1)-Cu-N(3) | 91.778  |
| Cu-N(5) | 2.103 | N(1)-Cu-N(5) | 96.526  |
| Cu-N(6) | 2.100 | N(1)-Cu-N(4) | 161.722 |

**Fig. S1.** Structure of  $\Delta\text{-}[\text{Cu}(\text{chxn})_3]^{2+}$ .  
 The hydrogen atoms are omitted for clarity.

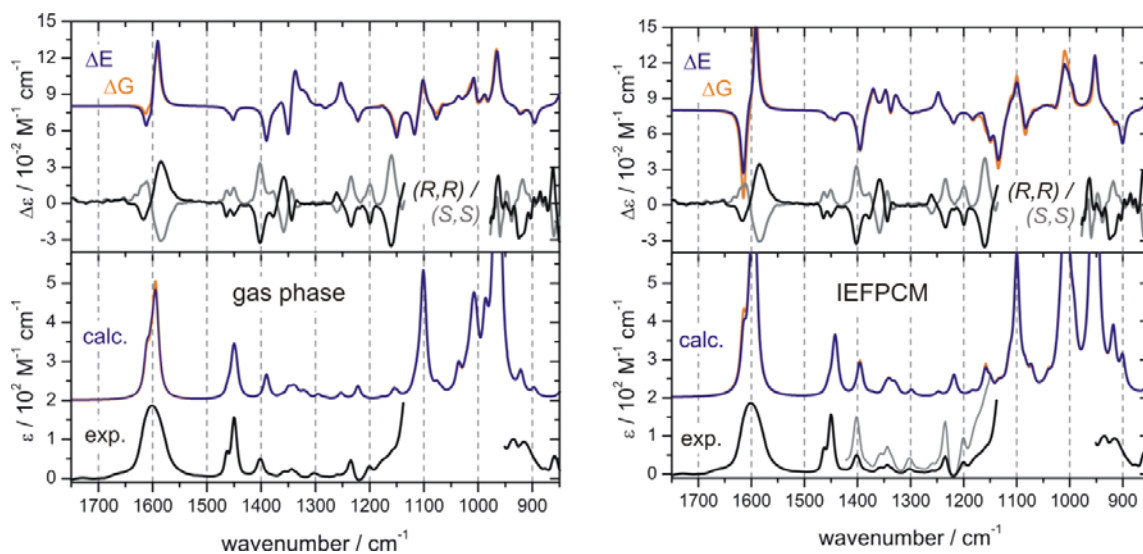

**Fig. S2.** Comparison of the experimental spectra with the  $\Delta E$  and  $\Delta G$  based population weighted spectra of  $[\text{Cu}(\text{chxn})_3]^{2+}$  in the gas phase (left) and using the IEFPCM for DMSO (right).

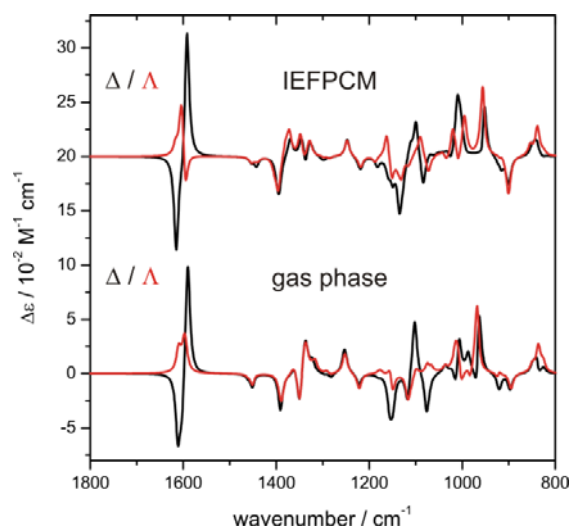

**Fig. S3.** VCD spectra of the  $\Delta$ - and  $\Lambda$ -isomer of  $[\text{Cu}(\text{chxn})_3]^{2+}$  calculated in the gas phase (bottom) and using the IEFPCM of DMSO (top).

## 2. Direct comparison of the experimental VCD spectra of all three complexes investigated

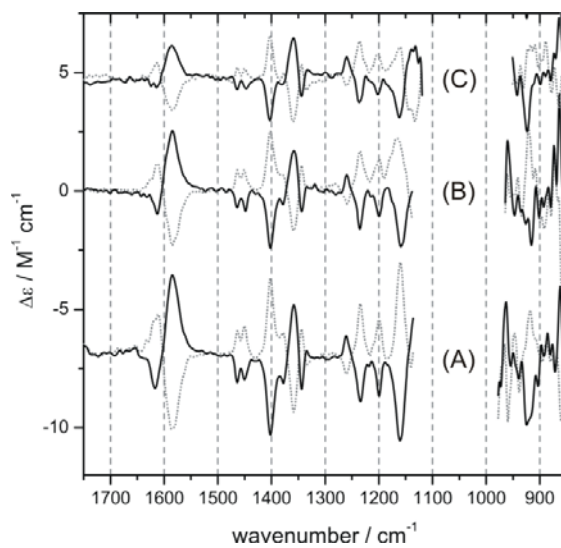

**Fig. S4.** Comparison of the experimental VCD spectra of (A)  $[\text{Cu}(\text{chxn})_3](\text{ClO}_4)_2$ , (B)  $[\text{Cu}(\text{chxn})_2\text{en}](\text{ClO}_4)_2$ , and (C)  $[\text{Cu}(\text{chxn})_2(\text{dmen})](\text{ClO}_4)_2$

### 3. Structures and energies of $[\text{Cu}(\text{chxn})_2(\text{en})]^{2+}$

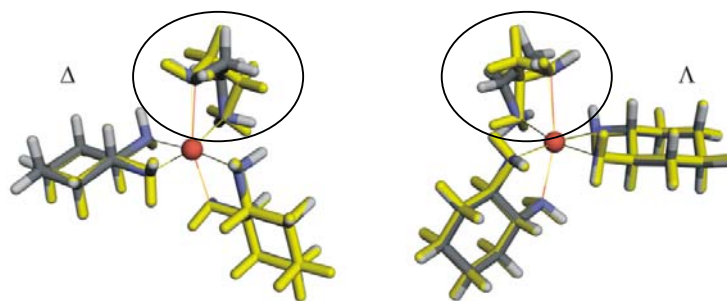

**Fig. S5.** Superposition of the structures of the  $\Delta$ - and  $\Lambda$ -isomers of  $[\text{Cu}(\text{chxn})_2(\text{en})]^{2+}$  showing the high similarity of the structures. The ligands of the  $\Delta$ -isomers are in gray scale, while those of the  $\Lambda$ -isomers are in yellow. The differences are only visible for the conformation of the en-ligand highlighted with ovals.

**Table S2.** Relative energies ( $\Delta E$ ) and Gibbs free energies ( $\Delta G$ ), as well as the corresponding percentage Boltzmann population factors at room temperature of the calculated conformers of  $\text{Cu}(\text{chxn})_2(\text{en})^{2+}$  in the gas phase and using the IEFPCM for DMSO. In the  $C_1$  conformers, en occupies an axial position, while it occupies two equatorial positions in the  $C_2$  conformers.

|                                  |    | gas phase                |                          |                        |                        | IEFPCM (DMSO)            |                          |                        |                        |
|----------------------------------|----|--------------------------|--------------------------|------------------------|------------------------|--------------------------|--------------------------|------------------------|------------------------|
| conf                             | en | $\Delta E$<br>(kcal/mol) | $\Delta G$<br>(kcal/mol) | pop- $\Delta E$<br>(%) | pop- $\Delta G$<br>(%) | $\Delta E$<br>(kcal/mol) | $\Delta G$<br>(kcal/mol) | pop- $\Delta E$<br>(%) | pop- $\Delta G$<br>(%) |
| $\Lambda(\delta\text{-en}) C_1$  | ax | 0.00                     | 0.23                     | 31.05                  | 25.87                  | 0.27                     | 1.11                     | 17.14                  | 7.38                   |
| $\Lambda(\delta\text{-en}) C_2$  | eq | 1.74                     | 1.79                     | 1.65                   | 1.84                   | 1.52                     | 3.19                     | 2.06                   | 0.22                   |
| $\Delta(\delta\text{-en}) C_1$   | ax | 0.06                     | 0.00                     | 28.25                  | 37.96                  | 0.00                     | 0.00                     | 26.86                  | 48.18                  |
| $\Delta(\delta\text{-en}) C_2$   | eq | 1.74                     | 2.47                     | 1.64                   | 0.59                   | 0.37                     | 1.14                     | 14.37                  | 7.07                   |
| $\Delta(\lambda\text{-en}) C_1$  | ax | 0.30                     | 0.29                     | 18.79                  | 23.19                  | 0.15                     | 0.32                     | 20.89                  | 27.98                  |
| $\Delta(\lambda\text{-en}) C_2$  | Eq | 2.12                     | 3.02                     | 0.86                   | 0.23                   | 0.99                     | 2.09                     | 5.09                   | 1.42                   |
| $\Lambda(\lambda\text{-en}) C_1$ | Ax | 0.37                     | 0.79                     | 16.63                  | 10.02                  | 0.53                     | 1.18                     | 11.05                  | 6.61                   |
| $\Lambda(\lambda\text{-en}) C_2$ | Eq | 1.96                     | 2.87                     | 1.13                   | 0.30                   | 1.39                     | 2.21                     | 2.55                   | 1.15                   |

### 4. Single-isomer spectra

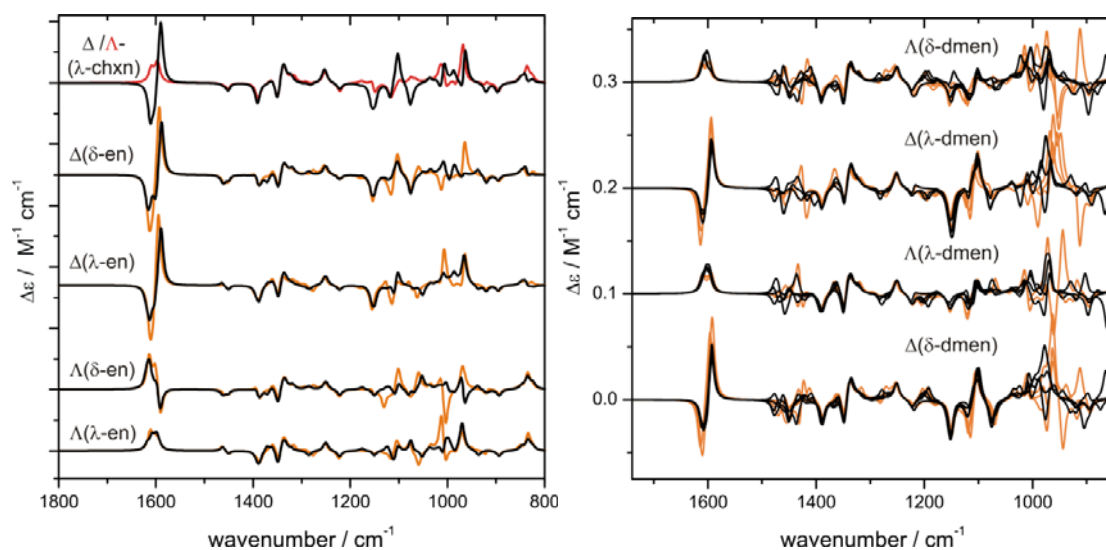

**Fig. S6.** Comparison of the single-isomer spectra of  $[\text{Cu}(\text{chxn})_3]^{2+}$ ,  $[\text{Cu}(\text{chxn})_2(\text{en})]^{2+}$ , and  $[\text{Cu}(\text{chxn})_2(\text{dmen})]^{2+}$ .

## 5. Cartesian coordinates of $[\text{Cu}(\text{chxn})_3]^{2+}$ and $[\text{Cu}(\text{chxn})_2(\text{en})]^{2+}$

### $\Delta$ - $[\text{Cu}(\text{chnx})_3]^{2+}$

|    |             |             |             |
|----|-------------|-------------|-------------|
| Cu | 0.00000000  | 0.00000000  | 0.08877600  |
| N  | 0.00000000  | 2.52506600  | -0.31163800 |
| H  | 0.88552900  | 2.99579700  | -0.48634100 |
| N  | -1.51196700 | 0.30894500  | -1.33668900 |
| H  | -2.29294100 | -0.32121000 | -1.15948200 |
| N  | 1.51196700  | -0.30894500 | -1.33668900 |
| H  | 2.29294100  | 0.32121000  | -1.15948200 |
| N  | 0.00000000  | -2.52506600 | -0.31163800 |
| H  | 0.40575300  | -3.04192600 | 0.46795200  |
| H  | -0.88552900 | -2.99579700 | -0.48634100 |
| N  | 1.37529500  | 0.00085700  | 1.67830700  |
| H  | 1.79960900  | -0.92061200 | 1.78217700  |
| N  | -1.37529500 | -0.00085700 | 1.67830700  |
| H  | -1.79960900 | 0.92061200  | 1.78217700  |
| H  | -2.15228800 | -0.64254600 | 1.53218000  |
| H  | -1.18327300 | 0.04072500  | -2.26399900 |
| H  | 1.18327300  | -0.04072500 | -2.26399900 |
| H  | 2.15228800  | 0.64254600  | 1.53218000  |
| H  | -0.40575300 | 3.04192600  | 0.46795200  |
| C  | 0.67538900  | 0.35489100  | 2.95355500  |
| C  | -0.67538900 | -0.35489100 | 2.95355500  |
| C  | 0.87827700  | -2.70579000 | -1.49859100 |
| C  | 2.04322200  | -1.71097900 | -1.42907700 |
| C  | -0.87827700 | 2.70579000  | -1.49859100 |
| C  | -2.04322200 | 1.71097900  | -1.42907700 |
| H  | -0.49785100 | -1.43506600 | 2.91016400  |
| H  | 0.49785100  | 1.43506600  | 2.91016400  |
| H  | -0.27277300 | 2.45114200  | -2.37770100 |
| H  | -2.59182400 | 1.89123300  | -0.49741700 |
| H  | 2.59182400  | -1.89123300 | -0.49741700 |
| H  | 0.27277300  | -2.45114200 | -2.37770100 |
| C  | -3.00648800 | 1.86725200  | -2.61179100 |
| H  | -3.84539900 | 1.17475800  | -2.49479000 |
| H  | -2.48307500 | 1.57622500  | -3.53193100 |
| C  | -1.39317000 | 4.14278600  | -1.66354600 |
| H  | -0.53925200 | 4.81746400  | -1.76751800 |
| H  | -1.91161300 | 4.43549900  | -0.74111700 |
| C  | 1.39317000  | -4.14278600 | -1.66354600 |
| H  | 0.53925200  | -4.81746400 | -1.76751800 |
| H  | 1.91161300  | -4.43549900 | -0.74111700 |
| C  | 3.00648800  | -1.86725200 | -2.61179100 |
| H  | 3.84539900  | -1.17475800 | -2.49479000 |
| H  | 2.48307500  | -1.57622500 | -3.53193100 |
| C  | 1.48344300  | 0.03018300  | 4.21154300  |
| H  | 2.42430000  | 0.58696100  | 4.20179100  |
| H  | 1.74414300  | -1.03588400 | 4.20267500  |
| C  | -1.48344300 | -0.03018300 | 4.21154300  |
| H  | -2.42430000 | -0.58696100 | 4.20179100  |
| H  | -1.74414300 | 1.03588400  | 4.20267500  |
| C  | 0.67946800  | 0.35304800  | 5.47968500  |
| C  | -0.67946800 | -0.35304800 | 5.47968500  |
| C  | 3.51344600  | -3.30728200 | -2.75163500 |
| C  | 2.34709100  | -4.29223700 | -2.85317500 |
| C  | -3.51344600 | 3.30728200  | -2.75163500 |
| C  | -2.34709100 | 4.29223700  | -2.85317500 |
| H  | -1.25771100 | -0.06135700 | 6.35775500  |
| H  | -0.53438000 | -1.43615700 | 5.55268600  |
| H  | 0.53438000  | 1.43615700  | 5.55268600  |
| H  | 1.25771100  | 0.06135700  | 6.35775500  |
| H  | 1.80030600  | -4.12228200 | -3.78711600 |
| H  | 2.71798400  | -5.31756300 | -2.89779300 |
| H  | 4.14057900  | -3.56105100 | -1.89010800 |
| H  | 4.15551700  | -3.38044700 | -3.63099200 |
| H  | -4.14057900 | 3.56105100  | -1.89010800 |
| H  | -4.15551700 | 3.38044700  | -3.63099200 |
| H  | -2.71798400 | 5.31756300  | -2.89779300 |
| H  | -1.80030600 | 4.12228200  | -3.78711600 |

$\Lambda$ -[Cu(chnx)<sub>3</sub>]<sup>2+</sup>

|    |             |             |             |
|----|-------------|-------------|-------------|
| Cu | 0.00000000  | 0.00000000  | 0.16179100  |
| N  | 0.00000000  | 1.37316900  | 1.75219100  |
| H  | -0.62488000 | 2.16607600  | 1.62208900  |
| N  | 0.00000000  | -1.37316900 | 1.75219100  |
| H  | 0.62488000  | -2.16607600 | 1.62208900  |
| N  | 0.24393400  | -1.49310200 | -1.29317900 |
| H  | -0.48271500 | -1.41993200 | -2.00336900 |
| N  | 2.53108600  | -0.16874100 | -0.16056000 |
| H  | 2.90243000  | 0.61264500  | -0.70042400 |
| H  | 3.13697500  | -0.21591900 | 0.65600200  |
| N  | -0.24393400 | 1.49310200  | -1.29317900 |
| H  | -0.08721900 | 2.40702800  | -0.86822900 |
| N  | -2.53108600 | 0.16874100  | -0.16056000 |
| H  | -2.90243000 | -0.61264500 | -0.70042400 |
| H  | -3.13697500 | 0.21591900  | 0.65600200  |
| H  | -0.93513300 | -1.77213200 | 1.83968900  |
| H  | 0.08721900  | -2.40702800 | -0.86822900 |
| H  | 0.48271500  | 1.41993200  | -2.00336900 |
| H  | 0.93513300  | 1.77213200  | 1.83968900  |
| C  | -1.57720900 | 1.53168500  | -1.98387100 |
| C  | -2.70914400 | 1.41269300  | -0.95613300 |
| C  | 2.70914400  | -1.41269300 | -0.95613300 |
| C  | 1.57720900  | -1.53168500 | -1.98387100 |
| C  | -0.35159500 | 0.67687200  | 3.02971800  |
| C  | 0.35159500  | -0.67687200 | 3.02971800  |
| H  | -2.61348500 | 2.25095500  | -0.25375800 |
| H  | -1.61113200 | 0.64803700  | -2.63197700 |
| H  | -1.43252900 | 0.50258100  | 2.99004300  |
| H  | 1.43252900  | -0.50258100 | 2.99004300  |
| H  | 1.61113200  | -0.64803700 | -2.63197700 |
| H  | 2.61348500  | -2.25095500 | -0.25375800 |
| C  | 0.02076400  | -1.48416500 | 4.28648400  |
| H  | 0.57256100  | -2.42804300 | 4.27695700  |
| H  | -1.04638000 | -1.73947700 | 4.27683600  |
| C  | -0.02076400 | 1.48416500  | 4.28648400  |
| H  | -0.57256100 | 2.42804300  | 4.27695700  |
| H  | 1.04638000  | 1.73947700  | 4.27683600  |
| C  | 4.08012900  | -1.50873800 | -1.64072700 |
| H  | 4.86236900  | -1.47205100 | -0.87798100 |
| H  | 4.21748200  | -0.62087200 | -2.27165700 |
| C  | 1.72097700  | -2.78762700 | -2.85185700 |
| H  | 0.92295700  | -2.80900600 | -3.59991000 |
| H  | 1.58099900  | -3.67125700 | -2.21560600 |
| C  | -1.72097700 | 2.78762700  | -2.85185700 |
| H  | -0.92295700 | 2.80900600  | -3.59991000 |
| H  | -1.58099900 | 3.67125700  | -2.21560600 |
| C  | -4.08012900 | 1.50873800  | -1.64072700 |
| H  | -4.86236900 | 1.47205100  | -0.87798100 |
| H  | -4.21748200 | 0.62087200  | -2.27165700 |
| C  | -3.09425100 | 2.86425200  | -3.52880100 |
| C  | -4.22157100 | 2.77048100  | -2.49857300 |
| C  | 3.09425100  | -2.86425200 | -3.52880100 |
| C  | 4.22157100  | -2.77048100 | -2.49857300 |
| C  | 0.34776200  | -0.68223600 | 5.55488100  |
| C  | -0.34776200 | 0.68223600  | 5.55488100  |
| H  | -5.19259800 | 2.76766100  | -2.99638800 |
| H  | -4.20841100 | 3.65659800  | -1.85451500 |
| H  | -3.18975700 | 2.05349500  | -4.25928000 |
| H  | -3.16641000 | 3.79551600  | -4.09312000 |
| H  | 4.20841100  | -3.65659800 | -1.85451500 |
| H  | 5.19259800  | -2.76766100 | -2.99638800 |
| H  | 3.18975700  | -2.05349500 | -4.25928000 |
| H  | 3.16641000  | -3.79551600 | -4.09312000 |
| H  | 1.43185400  | -0.54537100 | 5.63014700  |
| H  | 0.05030800  | -1.25807800 | 6.43258900  |
| H  | -0.05030800 | 1.25807800  | 6.43258900  |
| H  | -1.43185400 | 0.54537100  | 5.63014700  |

$\Delta(\delta)$ -[Cu(chnx)<sub>2</sub>(en)]<sup>2+</sup>

|    |             |             |             |
|----|-------------|-------------|-------------|
| Cu | -0.07962400 | 0.67996100  | -0.08225600 |
| N  | 1.27267000  | -0.90615100 | -1.40533600 |
| H  | 1.32023900  | -0.78587000 | -2.41534600 |
| N  | 1.70490200  | 0.57974200  | 0.99757700  |
| H  | 1.53336500  | 0.59252100  | 2.00196500  |
| N  | 0.56644800  | 2.38010800  | -1.19215300 |
| H  | -0.04743000 | 2.50369500  | -1.99575900 |
| N  | -0.94894600 | 2.84666500  | 1.29359300  |
| H  | -1.91209400 | 2.90910200  | 1.61426000  |
| H  | -0.39160700 | 3.02236500  | 2.12725000  |
| N  | -1.84378900 | 0.49132900  | -1.17704600 |
| H  | -2.43734100 | 1.30904900  | -1.03711500 |
| N  | -1.06861500 | -0.67903000 | 1.18628700  |
| H  | -0.65164300 | -1.60729800 | 1.12034100  |
| H  | -0.99823800 | -0.41769800 | 2.16781200  |
| H  | 2.26113600  | 1.41701900  | 0.82567400  |
| H  | 1.48363600  | 2.20132200  | -1.59687100 |
| H  | -1.68921000 | 0.43194400  | -2.18216800 |
| H  | 0.95813500  | -1.86853800 | -1.28451500 |
| C  | -2.59124100 | -0.72516200 | -0.72153400 |
| C  | -2.51371100 | -0.76967600 | 0.80093200  |
| C  | -0.69340100 | 3.91859200  | 0.30745300  |
| C  | 0.60952900  | 3.66909500  | -0.43582500 |
| C  | 2.64709100  | -0.79200500 | -0.84443300 |
| C  | 2.56214900  | -0.61330800 | 0.67549300  |
| H  | -2.98859500 | 0.13454800  | 1.19638800  |
| H  | -2.04169700 | -1.58393700 | -1.12235300 |
| H  | 3.08216500  | 0.12314700  | -1.26657700 |
| H  | 2.04264600  | -1.48248900 | 1.09492900  |
| H  | 0.81624100  | 4.50096600  | -1.11291900 |
| H  | -0.65027200 | 4.91356000  | 0.75992900  |
| C  | 3.95013700  | -0.50142900 | 1.31664800  |
| H  | 3.84848900  | -0.42358400 | 2.40303100  |
| H  | 4.42065100  | 0.42973800  | 0.97510000  |
| C  | 3.55618400  | -1.97328000 | -1.20769400 |
| H  | 3.63337100  | -2.04407600 | -2.29586700 |
| H  | 3.07691300  | -2.90001800 | -0.86648600 |
| C  | -4.03734100 | -0.77891900 | -1.21749800 |
| H  | -4.05513200 | -0.78783900 | -2.31062500 |
| H  | -4.55900200 | 0.13191600  | -0.89739400 |
| C  | -3.22792400 | -1.99918700 | 1.36564800  |
| H  | -3.19391000 | -1.97862500 | 2.45812800  |
| H  | -2.69077100 | -2.90146300 | 1.04666800  |
| C  | -4.76249500 | -2.01114400 | -0.65601500 |
| C  | -4.68150700 | -2.06423300 | 0.87232900  |
| C  | 4.84782900  | -1.68843800 | 0.94477400  |
| C  | 4.94590100  | -1.85383600 | -0.57355700 |
| H  | -5.14692900 | -2.97835500 | 1.24405800  |
| H  | -5.25008300 | -1.23331000 | 1.30344100  |
| H  | -4.32283100 | -2.91883000 | -1.08287400 |
| H  | -5.80447100 | -1.99430600 | -0.97905100 |
| H  | 4.44912500  | -2.60452500 | 1.39371200  |
| H  | 5.83799100  | -1.54021700 | 1.37876000  |
| H  | 5.53729700  | -2.73676900 | -0.82136000 |
| H  | 5.47568100  | -0.99827100 | -1.00640200 |
| H  | -1.52446600 | 3.93799900  | -0.40333700 |
| H  | 1.44181600  | 3.61723000  | 0.27023000  |

$\Delta(\lambda)$ -  $[\text{Cu}(\text{chmx})_2(\text{en})]^{2+}$

|    |             |             |             |
|----|-------------|-------------|-------------|
| Cu | -0.07851400 | 0.67618800  | -0.07593300 |
| N  | 1.27827200  | -0.88950700 | -1.41676400 |
| H  | 1.32562900  | -0.75593400 | -2.42508300 |
| N  | 1.70570500  | 0.56292300  | 1.00663700  |
| N  | 0.52960100  | 2.37564300  | -1.20945100 |
| N  | -0.80416400 | 2.83637800  | 1.38479000  |
| N  | -1.85066900 | 0.49869100  | -1.16065400 |
| H  | -2.44465200 | 1.31568900  | -1.01983200 |
| N  | -1.06273600 | -0.69376800 | 1.18617600  |
| H  | -0.64808500 | -1.62196400 | 1.10558900  |
| H  | -0.98457600 | -0.44464400 | 2.17024900  |
| H  | 1.51844800  | 0.55143900  | 2.00807600  |
| H  | -1.69622800 | 0.44472300  | -2.16594700 |
| H  | 0.96913000  | -1.85525600 | -1.30879100 |
| C  | -2.59836600 | -0.71961800 | -0.71075100 |
| C  | -2.51083000 | -0.77742900 | 0.81072700  |
| C  | -0.10134000 | 3.91027900  | 0.64960000  |
| C  | -0.14899300 | 3.65877500  | -0.84941100 |
| C  | 2.65330000  | -0.77550300 | -0.85634500 |
| C  | 2.56951300  | -0.61979400 | 0.66625500  |
| H  | -2.98078100 | 0.12439000  | 1.21784900  |
| H  | -2.05357000 | -1.57639200 | -1.12222800 |
| H  | 3.08073300  | 0.14828300  | -1.26635400 |
| H  | 2.05522600  | -1.49804800 | 1.07317900  |
| C  | 3.95766900  | -0.51095900 | 1.30747700  |
| H  | 3.85694200  | -0.45002100 | 2.39500400  |
| H  | 4.42345900  | 0.42747500  | 0.97950800  |
| C  | 3.56765700  | -1.94655300 | -1.23852300 |
| H  | 3.64407100  | -2.00045200 | -2.32773300 |
| H  | 3.09368500  | -2.88092900 | -0.91096100 |
| C  | -4.04767300 | -0.76524000 | -1.19791100 |
| H  | -4.07256100 | -0.76447000 | -2.29093400 |
| H  | -4.56479000 | 0.14412800  | -0.86636900 |
| C  | -3.22432400 | -2.01026200 | 1.36905800  |
| H  | -3.18306100 | -1.99986700 | 2.46141800  |
| H  | -2.69152600 | -2.91081300 | 1.03811600  |
| C  | -4.77248100 | -2.00040400 | -0.64244200 |
| C  | -4.68130700 | -2.06730500 | 0.88482000  |
| C  | 4.86048600  | -1.68783800 | 0.91647000  |
| C  | 4.95758100  | -1.82973200 | -0.60432300 |
| H  | -5.14652300 | -2.98358500 | 1.25144800  |
| H  | -5.24491900 | -1.23889200 | 1.32711700  |
| H  | -4.33847100 | -2.90545700 | -1.08054200 |
| H  | -5.81657400 | -1.97765000 | -0.95821900 |
| H  | 4.46652800  | -2.61249700 | 1.35182200  |
| H  | 5.85046200  | -1.54172800 | 1.35161200  |
| H  | 5.55320100  | -2.70576700 | -0.86610400 |
| H  | 5.48242400  | -0.96496400 | -1.02470500 |
| H  | -0.55553300 | 2.88665100  | 2.36972800  |
| H  | -1.80524200 | 3.02016700  | 1.36603000  |
| H  | 0.93840200  | 3.93583600  | 0.98759100  |
| H  | -0.51448300 | 4.90334500  | 0.84853900  |
| H  | 0.31006500  | 4.49492700  | -1.38170100 |
| H  | -1.18524300 | 3.59303800  | -1.18852700 |
| H  | 0.37953800  | 2.19138100  | -2.19966800 |
| H  | 1.53603100  | 2.50953400  | -1.12722000 |
| H  | 2.26233700  | 1.40584100  | 0.86676100  |



$\Lambda(\delta)$ -[Cu(chnx)<sub>2</sub>(en)]<sup>2+</sup>

|    |             |             |             |
|----|-------------|-------------|-------------|
| Cu | 0.07251600  | 0.61132900  | -0.09004400 |
| N  | -1.27462600 | -1.03388500 | -1.34827400 |
| H  | -0.83450100 | -1.90569600 | -1.63577900 |
| N  | -1.69808900 | 0.52794700  | 1.00569800  |
| H  | -1.96341800 | 1.45112600  | 1.34500400  |
| N  | 0.82075200  | 2.79439400  | 1.36491500  |
| N  | -0.57744100 | 2.30323200  | -1.20059100 |
| N  | 1.84791500  | 0.47851400  | -1.17246600 |
| H  | 1.67580300  | -0.10583500 | -1.99132900 |
| N  | 1.08468700  | -0.75563500 | 1.15519600  |
| H  | 1.39556800  | -0.24745100 | 1.98369900  |
| H  | 0.52088000  | -1.52889300 | 1.50282000  |
| H  | -1.54621500 | -0.01603900 | 1.85489900  |
| H  | 2.19114600  | 1.36361700  | -1.54018200 |
| H  | -1.65291000 | -0.64795500 | -2.21327000 |
| C  | 2.91908300  | -0.15920300 | -0.34210200 |
| C  | 2.28175400  | -1.30251400 | 0.44136400  |
| C  | 0.09225400  | 3.59566700  | -0.85656100 |
| C  | 0.08063500  | 3.85127000  | 0.64268200  |
| C  | -2.41487700 | -1.35266200 | -0.44374100 |
| C  | -2.86337300 | -0.07544600 | 0.27439400  |
| H  | 1.89569100  | -2.03748900 | -0.27385100 |
| H  | 3.24500200  | 0.60690700  | 0.36993500  |
| H  | -2.02741000 | -2.04527200 | 0.31386400  |
| H  | -3.16072900 | 0.65566200  | -0.48683300 |
| C  | -4.05094700 | -0.32871200 | 1.21006600  |
| H  | -4.36856800 | 0.61430500  | 1.66463600  |
| H  | -3.71999300 | -0.97934900 | 2.02988900  |
| C  | -3.59417700 | -2.02256200 | -1.16092100 |
| H  | -3.25226400 | -2.95576500 | -1.61613200 |
| H  | -3.91689800 | -1.37256500 | -1.98456100 |
| C  | 4.12505800  | -0.63710800 | -1.15253100 |
| H  | 4.58236500  | 0.20866700  | -1.67322100 |
| H  | 3.78140000  | -1.33826000 | -1.92338200 |
| C  | 3.29722900  | -1.98468500 | 1.35977800  |
| H  | 2.82398700  | -2.82216400 | 1.87928400  |
| H  | 3.61807900  | -1.27201600 | 2.12976500  |
| C  | 5.15253600  | -1.32982600 | -0.24536800 |
| C  | 4.51810800  | -2.46716800 | 0.56139700  |
| C  | -5.22156000 | -0.99266800 | 0.47486500  |
| C  | -4.77742600 | -2.28109200 | -0.22125400 |
| H  | 5.24960600  | -2.89807900 | 1.24667900  |
| H  | 4.21550800  | -3.27544900 | -0.11294300 |
| H  | 5.59353800  | -0.59297300 | 0.43461300  |
| H  | 5.97234600  | -1.71153500 | -0.85576600 |
| H  | -5.63419700 | -0.29550700 | -0.26236800 |
| H  | -6.02358300 | -1.19787700 | 1.18568200  |
| H  | -5.60515800 | -2.71117800 | -0.78739900 |
| H  | -4.49617800 | -3.02906200 | 0.52802500  |
| H  | -1.58234200 | 2.42023900  | -1.08188900 |
| H  | -0.45652600 | 2.12583800  | -2.19638000 |
| H  | 1.12091300  | 3.54664100  | -1.22108300 |
| H  | -0.39220900 | 4.42438600  | -1.37784200 |
| H  | -0.95066900 | 3.86293000  | 1.00757500  |
| H  | 0.48098200  | 4.85280800  | 0.82542700  |
| H  | 1.81858900  | 2.98554600  | 1.30153500  |
| H  | 0.61122100  | 2.85747200  | 2.35839600  |

$\Lambda(\lambda)$ -[Cu(chnx)<sub>2</sub>(en)]<sup>2+</sup>

|    |             |             |             |
|----|-------------|-------------|-------------|
| Cu | 0.07207620  | 0.63817333  | -0.08507652 |
| N  | -1.24810101 | -1.04250411 | -1.33906208 |
| H  | -0.79206137 | -1.91095002 | -1.61147827 |
| N  | -1.70696412 | 0.54128776  | 1.00002526  |
| H  | -1.99370824 | 1.46451274  | 1.32069737  |
| N  | 0.92738483  | 2.79935233  | 1.28629369  |
| H  | 1.89409271  | 2.85849878  | 1.59668085  |
| N  | -0.61605512 | 2.31944614  | -1.18949257 |
| H  | -0.03930757 | 2.43635364  | -2.02110184 |
| H  | -1.54976268 | 2.13466527  | -1.55079967 |
| N  | 1.85593674  | 0.50655004  | -1.16445219 |
| H  | 1.68399155  | -0.05813100 | -1.99717470 |
| N  | 1.07376510  | -0.74357022 | 1.15113027  |
| H  | 1.39409906  | -0.24531474 | 1.98204173  |
| H  | 0.50154655  | -1.51209605 | 1.49543256  |
| H  | -1.55534878 | 0.01321356  | 1.85934613  |
| H  | 0.37974679  | 2.98905809  | 2.12346310  |
| H  | 2.21484291  | 1.39454771  | -1.51000243 |
| H  | -1.62659755 | -0.67641037 | -2.21248848 |
| C  | 2.91589248  | -0.15876721 | -0.34086964 |
| C  | 2.26132789  | -1.30081783 | 0.42958483  |
| C  | -0.63678143 | 3.61576794  | -0.44356902 |
| C  | 0.67295010  | 3.86154747  | 0.28913695  |
| C  | -2.38755903 | -1.36736042 | -0.43604015 |
| C  | -2.85773909 | -0.09003909 | 0.26788569  |
| H  | 1.86288360  | -2.02116282 | -0.29353535 |
| H  | 3.25391894  | 0.59377735  | 0.37969679  |
| H  | -1.99445997 | -2.04724395 | 0.33009460  |
| H  | -3.16322097 | 0.63009908  | -0.50028136 |
| H  | 1.50038231  | 3.86738578  | -0.42587312 |
| H  | -1.46580939 | 3.57891195  | 0.26689158  |
| C  | -4.04559438 | -0.35256504 | 1.20082640  |
| H  | -4.37879779 | 0.58966730  | 1.64575773  |
| H  | -3.70871107 | -0.99122419 | 2.02765361  |
| C  | -3.55431820 | -2.06093006 | -1.15177188 |
| H  | -3.19668294 | -2.99316209 | -1.59679284 |
| H  | -3.88226899 | -1.42331307 | -1.98299438 |
| C  | 4.11468264  | -0.64571773 | -1.15669736 |
| H  | 4.58466693  | 0.19908227  | -1.66762703 |
| H  | 3.76075080  | -1.33260265 | -1.93577297 |
| C  | 3.26629865  | -2.00938711 | 1.33965471  |
| H  | 2.78027521  | -2.84554649 | 1.84945553  |
| H  | 3.59792520  | -1.31094797 | 2.11812005  |
| C  | 5.13154047  | -1.36386947 | -0.25739652 |
| C  | 4.48009716  | -2.50086037 | 0.53605043  |
| C  | -5.20354649 | -1.03962207 | 0.46681569  |
| C  | -4.73829822 | -2.32789507 | -0.21553837 |
| H  | 5.20481491  | -2.95030134 | 1.21662976  |
| H  | 4.16603735  | -3.29683132 | -0.14763529 |
| H  | 5.58284499  | -0.64126665 | 0.43108272  |
| H  | 5.94606670  | -1.75050901 | -0.87175177 |
| H  | -5.62249786 | -0.35497878 | -0.27852344 |
| H  | -6.00576779 | -1.24946463 | 1.17604990  |
| H  | -5.55718297 | -2.77457122 | -0.78171222 |
| H  | -4.45027438 | -3.06515286 | 0.54174317  |
| H  | -0.84062779 | 4.44338780  | -1.12667744 |
| H  | 0.63991552  | 4.86176102  | 0.73087013  |
